# Supplementary material
Source: MDPI journal article supplement (https://www.mdpi.com/2072-4292/16/8/1454)
Supplement: s1 [file s1]

## Supplementary Materials

### Land suitability evaluation based on the suitability function

The suitability order of land suitability follows Yao's methods [1]. Based on modern land coverage types in the Tibetan Plateau, we extracted cultivated land and grassland, respectively. Subsequently, the land suitability rasters were masked by corresponding modern land coverage types. The suitable order is then divided into three classes using Jenks classification: highly, moderately, and marginally suitable. The Jenks classification aims to reduce intra-class variance and maximize inter-class variance, making it a widely used data clustering method [2]. The remaining areas are defined in terms of unsuitability.

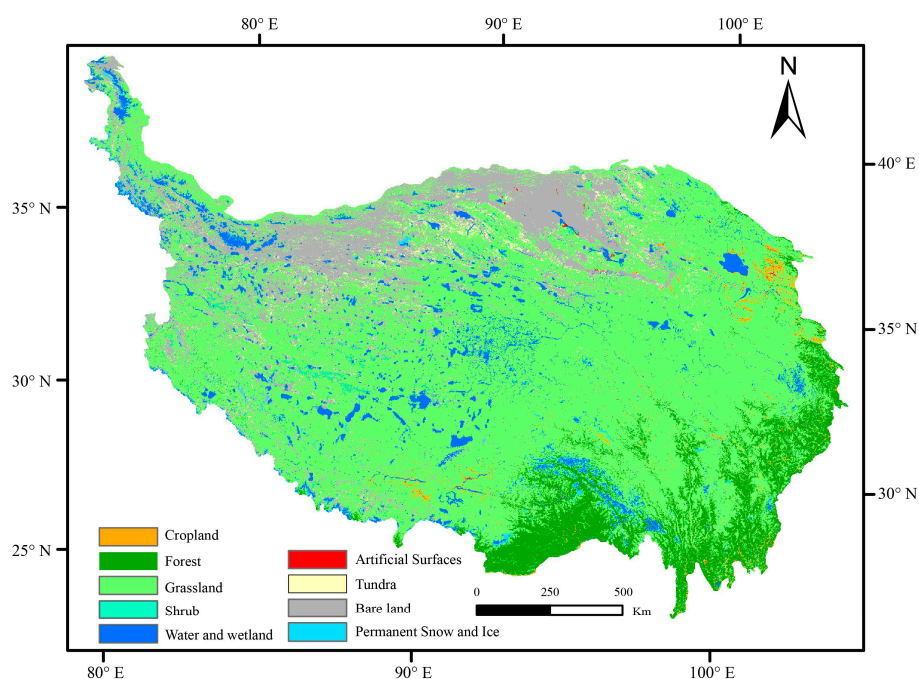

**Figure S1.** Modern land coverage types in the Tibetan Plateau [3].

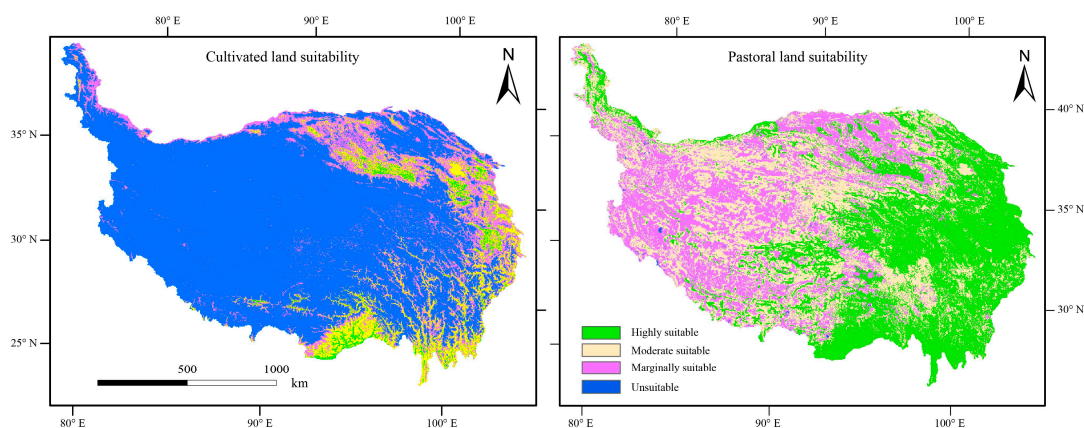

**Figure S2.** Suitability ordered class and distribution of cultivated and pastoral land in the modern Tibetan Plateau.

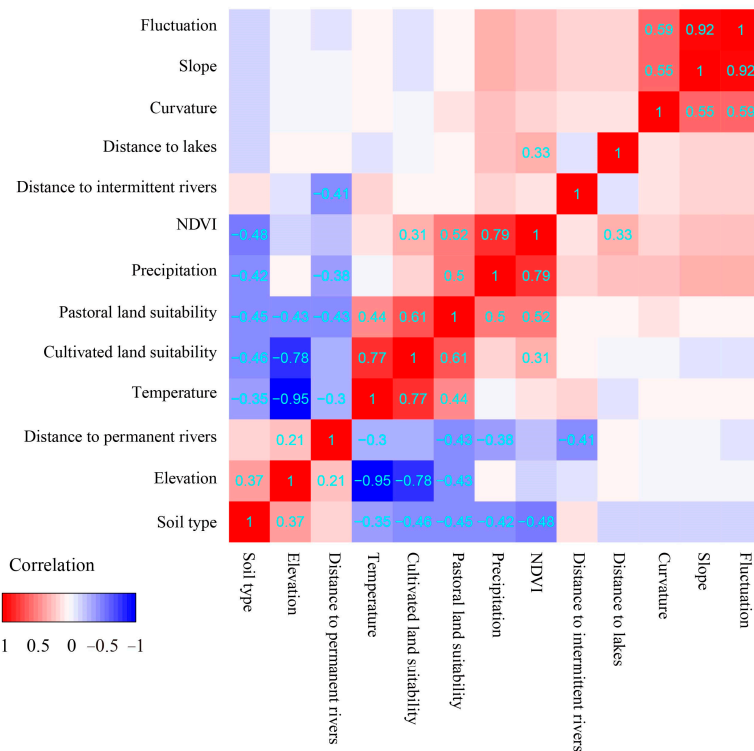

**Figure S3.** Dependent variables Pearson correlation heat map.

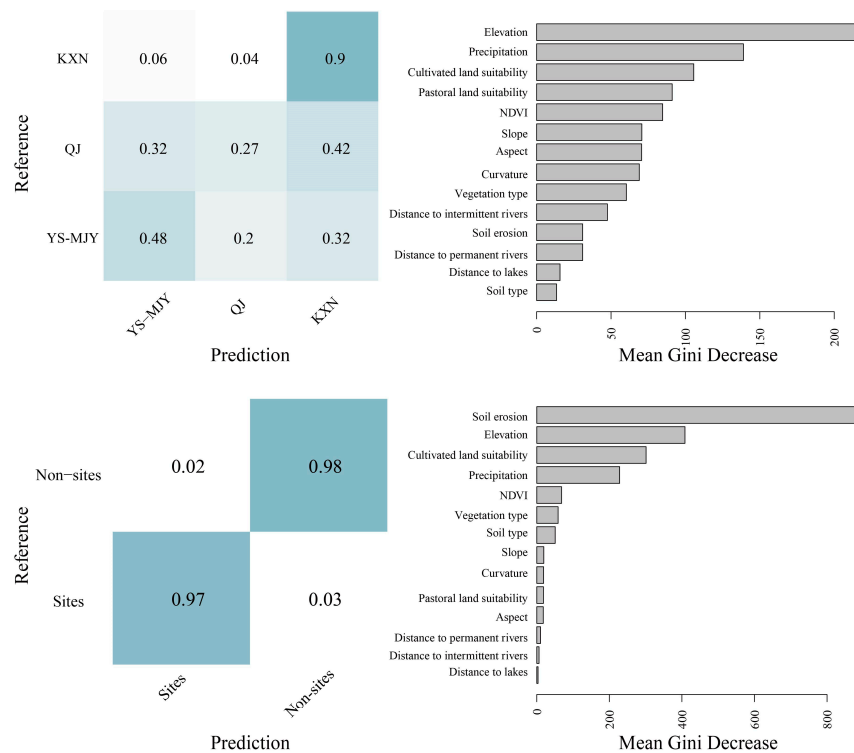

**Figure S4.** The importance rankings and OOB confusion matrix for the three-classification model (YS-MJY, QJ, and KXN cultures) and the binary classification model (sites and non-sites).

**Table S1.** The whole results of 10-fold CV, repeated 5 times.

|       | Iter | Error Rate | Accuracy | Kappa    | Multiclass AUC |
|-------|------|------------|----------|----------|----------------|
| rep.1 | 1    | 0.249462   | 0.750538 | 0.646932 | 0.908292       |
|       | 2    | 0.251073   | 0.748927 | 0.640297 | 0.894004       |
|       | 3    | 0.26824    | 0.73176  | 0.618038 | 0.891936       |
|       | 4    | 0.249462   | 0.750538 | 0.643275 | 0.890704       |
|       | 5    | 0.253763   | 0.746237 | 0.637793 | 0.891831       |
|       | 6    | 0.267666   | 0.732334 | 0.620676 | 0.892774       |
|       | 7    | 0.255914   | 0.744086 | 0.634311 | 0.889269       |
|       | 8    | 0.233906   | 0.766094 | 0.665811 | 0.911004       |
|       | 9    | 0.259657   | 0.740343 | 0.626805 | 0.898945       |
|       | 10   | 0.276231   | 0.723769 | 0.604279 | 0.882917       |
| rep.2 | 11   | 0.261803   | 0.738197 | 0.626173 | 0.897804       |
|       | 12   | 0.251073   | 0.748927 | 0.642879 | 0.903144       |
|       | 13   | 0.260215   | 0.739785 | 0.628393 | 0.895233       |
|       | 14   | 0.298283   | 0.701717 | 0.575261 | 0.871944       |
|       | 15   | 0.24197    | 0.75803  | 0.654513 | 0.901771       |
|       | 16   | 0.262366   | 0.737634 | 0.626506 | 0.898988       |
|       | 17   | 0.252677   | 0.747323 | 0.638903 | 0.904666       |
|       | 18   | 0.23176    | 0.76824  | 0.668461 | 0.906084       |
|       | 19   | 0.249462   | 0.750538 | 0.644671 | 0.902769       |
|       | 20   | 0.301075   | 0.698925 | 0.569615 | 0.864247       |
| rep.3 | 21   | 0.267666   | 0.732334 | 0.617977 | 0.886842       |
|       | 22   | 0.236052   | 0.763948 | 0.664423 | 0.907603       |
|       | 23   | 0.252677   | 0.747323 | 0.637585 | 0.888495       |
|       | 24   | 0.262931   | 0.737069 | 0.62636  | 0.886193       |
|       | 25   | 0.266094   | 0.733906 | 0.621644 | 0.901211       |
|       | 26   | 0.288172   | 0.711828 | 0.5889   | 0.883023       |
|       | 27   | 0.246781   | 0.753219 | 0.649188 | 0.90697        |
|       | 28   | 0.23176    | 0.76824  | 0.669649 | 0.905383       |
|       | 29   | 0.251073   | 0.748927 | 0.641109 | 0.897326       |
|       | 30   | 0.258065   | 0.741935 | 0.630828 | 0.886485       |
| rep.4 | 31   | 0.24086    | 0.75914  | 0.655631 | 0.899925       |
|       | 32   | 0.233906   | 0.766094 | 0.664896 | 0.906411       |
|       | 33   | 0.26824    | 0.73176  | 0.615725 | 0.9004         |
|       | 34   | 0.253219   | 0.746781 | 0.638418 | 0.891807       |
|       | 35   | 0.266094   | 0.733906 | 0.620683 | 0.898863       |
|       | 36   | 0.258065   | 0.741935 | 0.633064 | 0.895253       |
|       | 37   | 0.27409    | 0.72591  | 0.609282 | 0.882406       |
|       | 38   | 0.277419   | 0.722581 | 0.607356 | 0.893783       |
|       | 39   | 0.270386   | 0.729614 | 0.611641 | 0.89078        |
|       | 40   | 0.23176    | 0.76824  | 0.671037 | 0.90064        |
| rep.5 | 41   | 0.246781   | 0.753219 | 0.648156 | 0.900888       |
|       | 42   | 0.258065   | 0.741935 | 0.631515 | 0.879503       |
|       | 43   | 0.251073   | 0.748927 | 0.640135 | 0.899623       |
|       | 44   | 0.246781   | 0.753219 | 0.650401 | 0.905836       |
|       | 45   | 0.276824   | 0.723176 | 0.605743 | 0.887536       |
|       | 46   | 0.253219   | 0.746781 | 0.637455 | 0.908483       |
|       | 47   | 0.276824   | 0.723176 | 0.605642 | 0.885906       |
|       | 48   | 0.248927   | 0.751073 | 0.644174 | 0.901049       |

|         |          |          |          |          |
|---------|----------|----------|----------|----------|
| 49      | 0.26824  | 0.73176  | 0.616832 | 0.888682 |
| 50      | 0.258065 | 0.741935 | 0.632919 | 0.894297 |
| Average | 0.257923 | 0.742077 | 0.632919 | 0.895199 |

## References

1. Yao, M.; Shao, D.; Lv, C.; An, R.; Gu, W.; Zhou, C. Evaluation of arable land suitability based on the suitability function - A case study of the Qinghai-Tibet Plateau. *Sci. Total Environ.* **2021**, *787*, 147414. doi:10.1016/j.scitotenv.2021.147414.
2. Jenks, G.F. The data model concept in statistical mapping. *Int. yearb. Cartogr.* 1967, *7*, 186-190.
3. [dataset] Xu, E. 2019. Land use of the Tibet Plateau in 2015 (Version 1.0). National Tibetan Plateau / Third Pole Environment Data Center. <https://doi.org/10.11888/Geogra.tpd.c.270198>.
